# Supplementary material for: Pathogenic CD8+ T cells target K71+ Henle’s layer by forming cytolytic immune synapses in Alopecia Areata
Source: Research Square preprint supplement (doi:10.21203/rs.3.rs-9487026/v1), 2026-04-30
Supplement: Supplementary file 1 [file cf22709c7a1d27fbf21936f8.pdf]

# Supplementary figure 1.

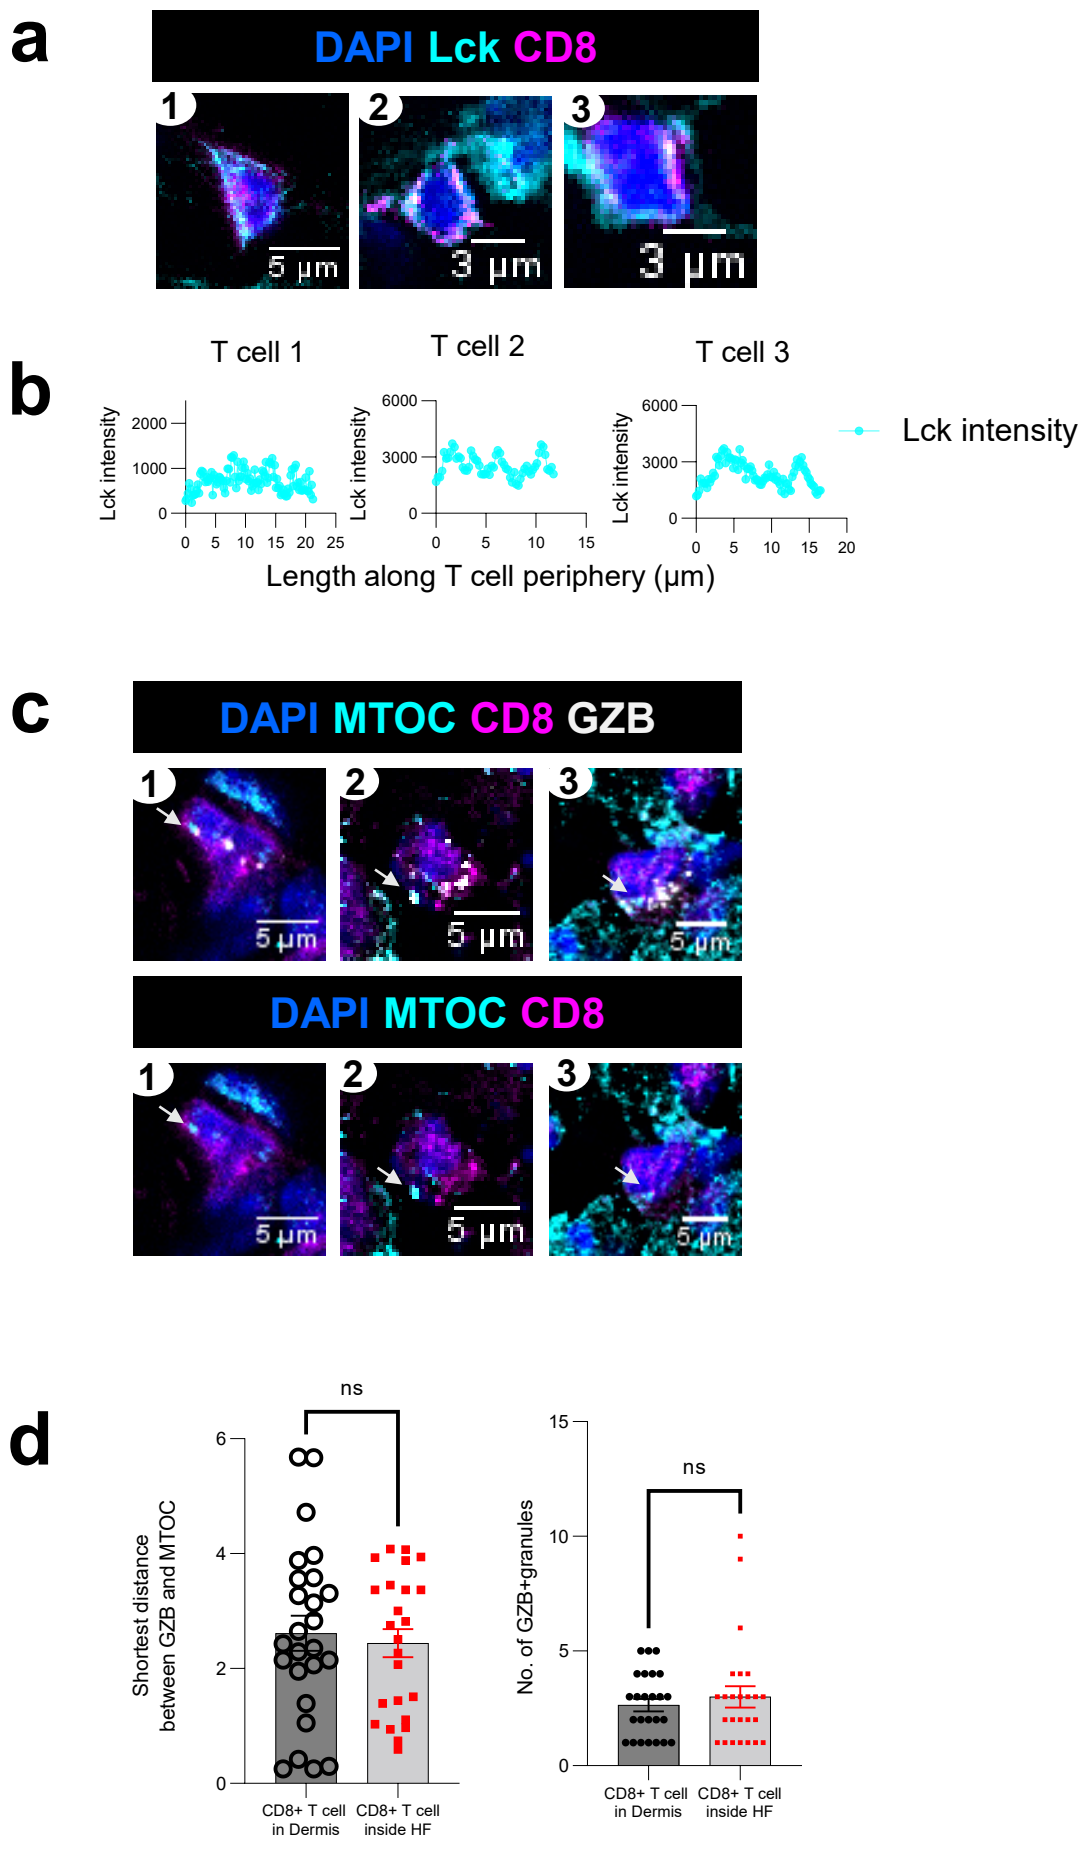

**Supplementary Figure 1.** CD8<sup>+</sup> T cells located in the dermis have converged granules at the MTOC but do not polarize Lck signaling kinase.

**a,** Three representative CD8<sup>+</sup> T cells (magenta) located in the dermis are magnified in panel 1, 2, and 3 to demonstrate the uniform distribution of Lck (cyan) along the boundary of T cell. Nuclei were stained with DAPI dye shown in blue.

**b,** Profile of Lck staining intensity along the boundary of T cells drawn based on CD8 staining shows uniform expression of Lck along the dermal T cell surface.

**c,** Three representative CD8<sup>+</sup> T cells (magenta) located in the dermis are magnified in panel 1, 2, and 3 to demonstrate the distribution of granzymes (grey) relative to MTOC (cyan). Nuclei were stained with DAPI dye shown in blue.

**d,** Graph shows the length of the shortest distance of GZB<sup>+</sup> granules to MTOC and no. of GZB<sup>+</sup> granules per T cells measured in CD8<sup>+</sup> T cells located within dermis or HF. N=25 CD8<sup>+</sup> T cells were analyzed in skin collected from 3 AA mice and unpaired two-tailed t test was performed. P<0.05 were considered statistically significant.

# Supplementary figure 2.

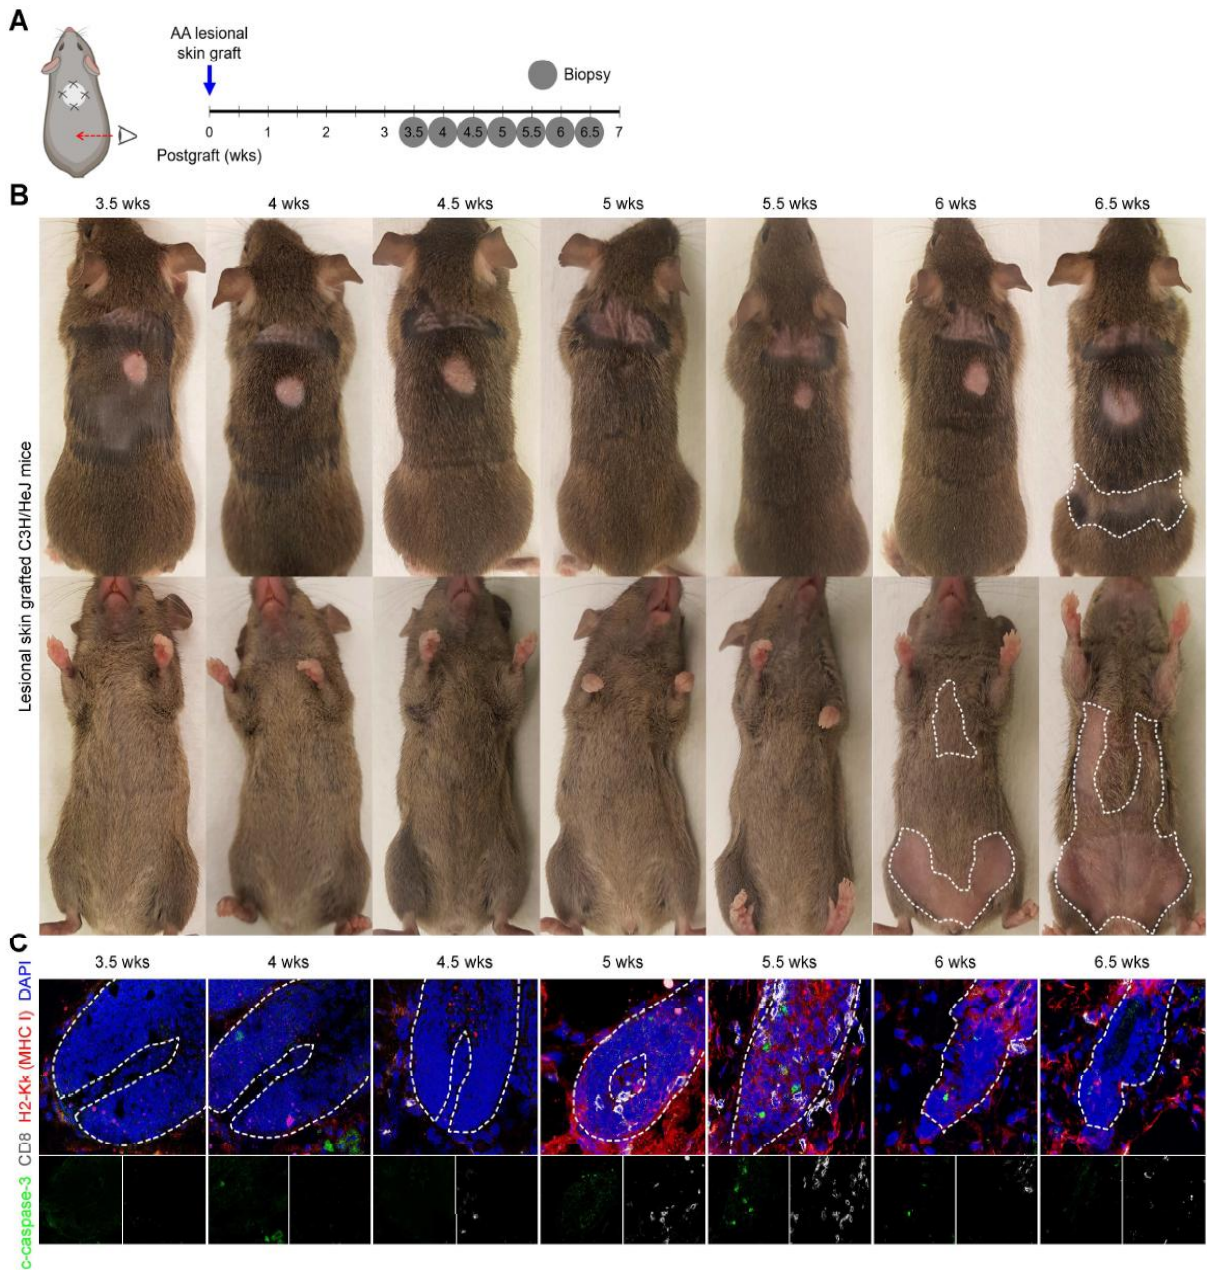

**Supplementary Figure 2.** CD8+ T cell infiltration was coincided with upregulation of MHC class I molecules

**a,** Experimental scheme of the lesional skin graft induced AA model in C3H/HeJ mice.

**b,** Gross photographs showing that typical hair loss was observed around postgraft 6 weeks in AA-affected C3H/HeJ mice.

**c,** Immunofluorescence showing that perifollicular CD8+ T cell infiltration was detected with cleaved (c-) caspase-3+ apoptotic epithelial cells as early as postgraft 5 weeks, which coincided with upregulation of MHC class I molecules.
