# Supplementary material for: Pathogenic CD8+ T cells target K71+ Henle’s layer by forming cytolytic immune synapses in Alopecia Areata
Source: Research Square preprint supplement (doi:10.21203/rs.3.rs-9487026/v1), 2026-04-30
Supplement: Supplementary file 2 [file e2fda9d69f90a920c280ae0f.pdf]

**Supplementary Table 1: List of antibodies used in the study**

| <b>Antigen</b>                                           | <b>Manufacturer</b>         | <b>Catalog number</b>    | <b>Clone</b> | <b>Dilution</b> |
|----------------------------------------------------------|-----------------------------|--------------------------|--------------|-----------------|
| Rabbit anti-cleaved-caspase-3 antibody, unconjugated     | Cell Signaling              | 9664 RRID:<br>AB_2070042 | 5A1E         | 1:400           |
| Rabbit anti-cleaved-caspase-8 antibody, unconjugated     | Cell Signaling              | 8592<br>AB_10891784      | D5B2         | 1:200           |
| Rat anti-Gata 3 antibody, unconjugated                   | Thermo Fisher               | 14-9966-82<br>AB_1210519 | TWAJ         | 1:100           |
| Chicken anti-Keratin 14 antibody, unconjugated           | BioLegend                   | 906001<br>AB_2565055     | Polyclonal   | 1:500           |
| Guinea pig anti-Keratin 71 antibody, unconjugated        | Progen                      | GP-K6IRS1<br>AB_2716781  | Polyclonal   | 1:100           |
| Rat anti-CD8a antibody, unconjugated                     | BioLegend                   | 100702<br>AB_312741      | 53-6.7       | 1:100           |
| Rat anti-CD4 antibody, unconjugated                      | BioLegend                   | 100406                   | GK1.5        | 1:100           |
| Anti-alpha smooth muscle actin                           | Abcam                       | ab5694                   | Polyclonal   | 1:100           |
| Rat anti-CD31 antibody                                   | BioLegend                   | 102514                   | MEC13.3      | 1:100           |
| Anti-GZB antibody                                        | BioLegend                   | 515406                   | GB11         | 1:500           |
| Anti-AE13 antibody                                       | Santa Cruz<br>Biotechnology | sc-57012                 | sc-57012     | 1:100           |
| Anti-K82 antibody                                        | Progen                      | GP-HHB2                  | Polyclonal   | 1:100           |
| Anti-Lck antibody                                        | Santa Cruz<br>Biotechnology | sc-433 AF647             | 3A5          | 1:100           |
| Anti-γ-tubulin                                           | Sigma-Aldrich               | T5326                    | GTU-88       | 1:500           |
| Anti-H60                                                 | R&D Systems                 | MAB1155                  | 205326       | 1:100           |
| Hamster anti-mouse CD103 antibody, PE/Cy7 conjugated     | BioLegend                   | 121426                   | 2E7          | 1:100           |
| Mouse anti-mouse H-2Kk (MHC I) antibody, FITC conjugated | BioLegend                   | 114905                   | 36-7-5       | 1:100           |
| anti-mouse CD16/32                                       | Biologend                   | 156604                   | S17111E      | 1:50            |
| Donkey anti-rabbit conjugated to Alexa Fluor 488         | Invitrogen                  | A21206                   |              | 1:200           |
| Donkey anti-rabbit conjugated to Alexa Fluor 647         | Thermo Fisher<br>Scientific | A31573                   |              | 1:200           |

**Supplementary Table 2 : Rae1 expression by cell cluster**

| <b>cluster</b>     | <b>p_val</b> | <b>avg_log2FC</b> | <b>pct.1</b> | <b>pct.2</b> | <b>p_val_adj</b> |
|--------------------|--------------|-------------------|--------------|--------------|------------------|
| DP2_AA.derm        | 4.767025e-11 | 0.5103628         | 0.16         | 0.273        | 9.158885e-07     |
| IRS, Henle_AA.derm | 4.975613e-27 | 0.2387017         | 0.463        | 0.23         | 9.559646e-23     |
| DP2_UG.derm        | 6.930502e-03 | -0.1231127        | 0.12         | 0.252        | 1.000000e+00     |
| IRS, Henle_UG.derm | 1.131614e-05 | -0.2030187        | 0.473        | 0.246        | 2.174169e-01     |
| IRS_UG.derm        | 1.151234e-06 | -0.2276423        | 0.396        | 0.241        | 2.211866e-02     |
| DS/DC_UG.derm      | 2.221640e-03 | -0.3663069        | 0.174        | 0.253        | 1.000000e+00     |
| ORS_UG.derm        | 6.797140e-07 | -0.4049061        | 0.058        | 0.253        | 1.305934e-02     |
| ORS_AA.derm        | 1.157550e-12 | -0.5135945        | 0.151        | 0.262        | 2.224001e-08     |

**Supplementary Table 3 : Ulbp1 expression by cell cluster**

| <b>cluster</b>     | <b>p_val</b> | <b>avg_log2FC</b> | <b>pct.1</b> | <b>pct.2</b> | <b>p_val_adj</b> |
|--------------------|--------------|-------------------|--------------|--------------|------------------|
| IRS, Henle_AA.derm | 1.331081e-58 | 3.782623          | 0.076        | 0.006        | 2.557405e-54     |
| IRS, Henle_UG.derm | 2.526109e-31 | 2.85335           | 0.115        | 0.01         | 4.853413e-27     |
| DP1_AA.derm        | 5.086444e-07 | -2.443            | 0.001        | 0.015        | 9.772586e-03     |
| DP2_AA.derm        | 7.765338e-07 | -4.613332         | 0            | 0.015        | 1.491954e-02     |
| ORS_AA.derm        | 5.761572e-04 | -3.570635         | 0            | 0.013        | 1.000000e+00     |

**Supplementary Table 4 : H60c expression by cell cluster**

| <b>cluster</b>     | <b>p_val</b>  | <b>avg_log2FC</b> | <b>pct.1</b> | <b>pct.2</b> | <b>p_val_adj</b> |
|--------------------|---------------|-------------------|--------------|--------------|------------------|
| IRS_UG.derm        | 7.128159e-154 | 3.472263          | 0.235        | 0.017        | 1.369533e-149    |
| IRS, Henle_UG.derm | 2.033547e-98  | 2.894091          | 0.324        | 0.024        | 3.907053e-94     |
| IRS_AA.derm        | 1.113542e-94  | 3.904486          | 0.28         | 0.023        | 2.139449e-90     |
| DP1_AA.derm        | 1.923092e-19  | -5.45146          | 0            | 0.04         | 3.694837e-15     |
| DP2_AA.derm        | 2.981917e-15  | -6.33015          | 0            | 0.037        | 5.729158e-11     |
| DS/DC_AA.derm      | 3.818694e-10  | -5.662404         | 0            | 0.035        | 7.336857e-06     |
| IRS, Henle_AA.derm | 1.744666e-04  | -2.072783         | 0.006        | 0.032        | 1.000000e+00     |
| DS/DC_UG.derm      | 1.378314e-03  | -3.724904         | 0            | 0.031        | 1.000000e+00     |
